# Supplementary material for: Effects of Exotic Spartina alterniflora Invasion on Soil Phosphorus and Carbon Pools and Associated Soil Microbial Community Composition in Coastal Wetlands
Source: PubMed Central journal article supplement — ACS Omega. 2021 Feb 13;6(8):5730–8. doi: 10.1021/acsomega.0c06161 (PMC7931372; doi:10.1021/acsomega.0c06161), 2021-02-13
Supplement: ao0c06161_si_001.pdf [file ao0c06161_si_001.pdf]

**Journal name:** ACS Omega

**Type of contribution:** RESEARCH ARTICLE

**Date of preparation:** 2020-12-16

**Number of text pages:** 18

**Number of tables:** 0

**Number of figures:** 7

**Title:** Effects of exotic *Spartina alterniflora* invasion on soil phosphorus and carbon pools and associated soil microbial community composition in coastal wetlands

**Names of authors:** Lei Wang<sup>a</sup>, Jiahui Yuan<sup>b,c</sup>, Yu Wang<sup>b,\*</sup>, Clayton R. Butterly<sup>d</sup>, Deli Tong<sup>e</sup>, Bo Zhou<sup>a</sup>, Xiuzhen Li<sup>f</sup>, Huabin Zhang<sup>g</sup>

**Complete postal address(es) or affiliations:**

<sup>a</sup> Nanjing Institute of Environmental Sciences, Ministry of Ecology and Environment, Nanjing 210042, China

<sup>b</sup> State Key Laboratory of Soil and Sustainable Agriculture, Changshu National Agro-Ecosystem Observation and Research Station, Institute of Soil Science, Chinese Academy of Sciences, Nanjing 210008, China.

<sup>c</sup> University of the Chinese Academy of Sciences, Beijing 10049, China

<sup>d</sup> School of Agriculture and Food, Faculty of Veterinary and Agricultural Sciences, University of Melbourne, Parkville Campus, VIC 3010, Australia

<sup>e</sup> College of Life Science, Shenyang Normal University, Shenyang 110034, China

<sup>f</sup> State Key Laboratory of Estuarine and Coastal Research, East China Normal University, Shanghai 200241, China

<sup>g</sup> Jiangsu Key Laboratory for Bioresources of Saline Soils, Jiangsu Provincial Key Laboratory of Coastal Wetland Bioresources and Environmental Protection, Jiangsu Synthetic Innovation Center for Coastal Bio-agriculture, Yancheng Teachers University, Yancheng 224007, China

**Full telephone, Fax No. and E-mail address of the corresponding author:**

\*Corresponding author: Yu Wang

Tel.: +86 25 86881354, Fax: +86 25 86881028

E-mail: [wangyu@issas.ac.cn](mailto:wangyu@issas.ac.cn)

**Figure S1**

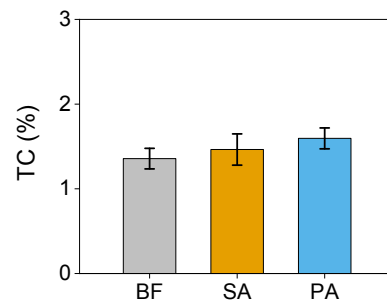

**Figure S1** The soil total carbon observed in the wetland soil samples. Soil samples were collected from three areas of wetland: bare flat land (BF), land invaded by *Spartina alterniflora* (SA), and land occupied by *Phragmites australis* (PA). Vertical bars indicate standard deviations of the mean ( $n = 3$ ). No significant differences were found between means.
